# Supplementary material for: K2(BeS)O4F2: a novel fluorosulfate with unprecedented 1D [(BeO3F)–(SO3F)]∞chains exhibiting large birefringence
Source: Royal Society of Chemistry journal article supplement (doi:10.1039/d2qi01860h), 2022-01-01
Supplement: d2qi01860h1.pdf [file d2qi01860h1.pdf]

# **$K_2(BeS)O_4F_2$ : A novel fluorosulfate with unprecedented 1D $[(BeO_3F)-(SO_3F)]_\infty$ chains exhibiting large birefringence**

Yingshuang Sun<sup>a,d</sup>, Chensheng Lin<sup>a</sup>, Shenghao Fang<sup>a</sup>, Haotian Tian<sup>a,d</sup>, Ning Ye<sup>c</sup> and Min Luo<sup>\*a,b</sup>

<sup>a</sup> Key Laboratory of Optoelectronic Materials Chemistry and Physics, Fujian Institute of Research on the Structure of Matter, Chinese Academy of Sciences, Fuzhou, Fujian 350002, P. R. China

<sup>b</sup> Fujian Science & Technology Innovation Laboratory for Optoelectronic Information of China, Fuzhou, Fujian 350002, China

<sup>c</sup> Tianjin Key Laboratory of Functional Crystal Materials, Institute of Functional Crystal, Tianjin University of Technology, Tianjin 300384, China

<sup>d</sup> University of Chinese Academy of Sciences, Beijing 100049, China

## Table of Contents

|            | Title                                                                                                                                     | Page |
|------------|-------------------------------------------------------------------------------------------------------------------------------------------|------|
| Table S1   | Crystal Data and Structure Refinement for $K_2(BeS)O_4F_2$                                                                                | S3   |
| Table S2   | Atomic Coordinates ( $\times 10^4$ ) and Equivalent Isotropic Displacement Parameters ( $\text{\AA}^2 \times 10^3$ ) for $K_2(BeS)O_4F_2$ | S3   |
| Table S3   | Selected Bond lengths [ $\text{\AA}$ ] and angles [ $^\circ$ ] for $K_2(BeS)O_4F_2$ .                                                     | S4   |
| Table S4   | Anisotropic Displacement Parameters ( $\text{\AA}^2 \times 10^3$ ) for $K_2(BeS)O_4F_2$                                                   | S4   |
| Table S5   | The elemental content ICP analysis                                                                                                        | S4   |
| Table S6   | The elemental content EA analysis                                                                                                         | S4   |
| Table S7   | Experimental birefringence of $K_2(BeS)O_4F_2$ at 546.1 nm                                                                                | S5   |
| Figure S1  | Powder XRD patterns of the simulated and experimental for $K_2(BeS)O_4F_2$                                                                | S6   |
| Figure S2  | EDS analysis of single crystal for $K_2(BeS)O_4F_2$                                                                                       | S6   |
| Figure S3  | Polyhedron of K and O atoms for $K_2(BeS)O_4F_2$                                                                                          | S7   |
| Figure S4  | TG and DTA curve of $K_2(BeS)O_4F_2$                                                                                                      | S7   |
| Figure S5  | IR transmittance spectra of $K_2(BeS)O_4F_2$                                                                                              | S8   |
| Figure S6  | Measurement of birefringence for $K_2(BeS)O_4F_2$                                                                                         | S8   |
| Figure S7  | Calculated electronic band structure of $K_2(BeS)O_4F_2$                                                                                  | S9   |
| Figure S8  | TDOS and PDOS of $K_2(BeS)O_4F_2$                                                                                                         | S9   |
| Figure S9  | The calculated SHG coefficient of $K_2(BeS)O_4F_2$                                                                                        | S10  |
| Figure S10 | The identified way about Be and S atoms in calculating part                                                                               | S10  |

**Table S1.** Crystal Data and Structure Refinement for  $K_2(BeS)O_4F_2$ .

|                                                                      |                                   |
|----------------------------------------------------------------------|-----------------------------------|
| Formula                                                              | $K_2(BeS)O_4F_2$                  |
| Formula weight (amu)                                                 | 221.27                            |
| Temperature (K)                                                      | 293(2)                            |
| Wavelength (Å)                                                       | 1.34139                           |
| Crystal system                                                       | Orthorhombic                      |
| Space group                                                          | $P2_12_12_1$                      |
| a (Å)                                                                | 4.5337(4)                         |
| b (Å)                                                                | 5.4828(6)                         |
| c (Å)                                                                | 12.0877(13)                       |
| $\alpha$ (deg)                                                       | 90                                |
| $\beta$ (deg)                                                        | 90                                |
| $\gamma$ (deg)                                                       | 90                                |
| V (Å <sup>3</sup> )                                                  | 300.47(5)                         |
| Z                                                                    | 2                                 |
| Calculated density (g/cm <sup>3</sup> )                              | 2.446                             |
| Absorption coefficient (mm <sup>-1</sup> )                           | 11.362                            |
| F(000)                                                               | 216                               |
| Theta range ( $\theta$ )                                             | 9.091-60.729                      |
|                                                                      | $-4 \leq h \leq 5$                |
| Limiting indices                                                     | $-6 \leq k \leq 7$                |
|                                                                      | $-15 \leq l \leq 15$              |
| Reflections collected / unique                                       | 1008 / 595                        |
| R <sub>int</sub>                                                     | 0.0230                            |
| Completeness to $\theta = 53.594^\circ$ (%)                          | 96                                |
| GOF on F <sup>2</sup>                                                | 1.119                             |
| R/wR(I>2 $\sigma$ (I))                                               | $R_I = 0.0669$<br>$wR_2 = 0.1800$ |
| R/wR(all data)                                                       | $R_I = 0.0700$<br>$wR_2 = 0.1847$ |
| Absolute structure parameter                                         | 0.45(11)                          |
| $^a R_I = \sum   F_o  -  F_c   / \sum  F_o $                         |                                   |
| $^b wR_2(F_o^2) = [\sum w(F_o^2 - F_c^2)^2 / \sum w(F_o^2)^2]^{1/2}$ |                                   |

**Table S2.** Atomic Coordinates ( $\times 10^4$ ) and Equivalent Isotropic Displacement Parameters (Å<sup>2</sup> $\times 10^3$ ) for  $K_2(BeS)O_4F_2$ .

| Atom   | x         | y        | z       | U(eq) |
|--------|-----------|----------|---------|-------|
| K(001) | 2735(4)   | 7981(3)  | 6453(2) | 29(1) |
| O(002) | 7639(13)  | 978(11)  | 6555(4) | 23(1) |
| O(003) | 11653(11) | 2743(13) | 5404(4) | 28(2) |
| S(004) | 8288(9)   | 2851(9)  | 5692(4) | 41(1) |
| F(005) | 7630(17)  | 5384(11) | 6062(7) | 55(2) |
| Be(0)  | 8288(9)   | 2851(9)  | 5692(4) | 41(1) |

**Table S3.** Selected Bond lengths [Å] and angles [°] for K<sub>2</sub>(BeS)<sub>4</sub>F<sub>2</sub>.

|                 |          |                            |            |
|-----------------|----------|----------------------------|------------|
| K(001)-O(002)#1 | 2.652(6) | O(002)#1-K(001)-O(002)#3   | 104.90(13) |
| K(001)-O(002)#2 | 2.838(6) | O(003)#2-K(001)-O(003)#4   | 127.18(19) |
| K(001)-O(002)#3 | 2.767(6) | F(005)#4-K(001)-O(002)#2   | 67.86(17)  |
| K(001)-O(003)#4 | 3.177(7) | K(001)#7-O(002)-K(001)#8   | 109.32(18) |
| K(001)-O(003)#2 | 2.943(7) | O(002)-S(004)-K(001)#11    | 164.2(3)   |
| K(001)-S(004)#2 | 3.470(5) | O(002)-S(004)-O(003)       | 108.7(4)   |
| K(001)-S(004)#1 | 3.483(5) | O(003)#12-S(004)-K(001)#7  | 141.8(3)   |
| K(001)-S(004)#5 | 3.465(5) | F(005)-S(004)-K(001)#9     | 116.9(4)   |
| K(001)-F(005)#1 | 3.284(9) | F(005)-S(004)-O(002)       | 113.1(5)   |
| K(001)-F(005)#5 | 3.170(9) | K(001)#10-F(005)-K(001)#11 | 90.3(2)    |
| K(001)-F(005)#4 | 2.759(7) | K(001)#8-Be(0)-K(001)#9    | 77.23(10)  |
| K(001)-F(005)   | 2.679(7) | O(002)-Be(0)-K(001)#7      | 45.2(3)    |
| O(002)-S(004)   | 1.493(7) | O(002)-Be(0)-O(003)#12     | 111.0(4)   |
| O(002)-Be(0)    | 1.493(7) | O(003)#12-Be(0)-K(001)#11  | 57.7(3)    |
| O(003)-S(004)#6 | 1.553(7) | F(005)-Be(0)-K(001)#7      | 69.9(4)    |
| O(003)-S(004)   | 1.566(7) | F(005)-Be(0)-O(003)#12     | 110.9(5)   |
| O(003)-Be(0)    | 1.566(7) | O(003)#12-Be(0)-O(003)     | 105.6(3)   |
| S(004)-F(005)   | 1.489(7) | O(002)-Be(0)-K(001)#8      | 53.1(3)    |
| F(005)-Be(0)    | 1.489(7) | K(001)#11-F(005)-K(001)#7  | 172.5(2)   |

**Table S4.** Anisotropic Displacement Parameters (Å<sup>2</sup>×10<sup>3</sup>) for K<sub>2</sub>(BeS)<sub>4</sub>F<sub>2</sub>

The Anisotropic displacement factor exponent takes the form:  $-2\pi^2[h^2a^2U_{11}+2hka*b*U_{12}+\dots]$ .

| Atom   | U <sub>11</sub> | U <sub>22</sub> | U <sub>33</sub> | U <sub>23</sub> | U <sub>13</sub> | U <sub>12</sub> |
|--------|-----------------|-----------------|-----------------|-----------------|-----------------|-----------------|
| K(001) | 23(1)           | 24(1)           | 39(1)           | 7(1)            | 0(1)            | -1(1)           |
| O(002) | 21(3)           | 26(3)           | 22(2)           | 9(2)            | 4(3)            | -4(3)           |
| O(003) | 12(2)           | 49(4)           | 24(2)           | 1(3)            | -2(2)           | 2(3)            |
| S(004) | 31(2)           | 45(2)           | 45(2)           | 3(2)            | 0(1)            | 1(2)            |
| F(005) | 27(3)           | 32(3)           | 106(5)          | -17(3)          | -6(4)           | 3(3)            |
| Be(0)  | 31(2)           | 45(2)           | 45(2)           | 3(2)            | 0(1)            | 1(2)            |

**Table S5.** The elemental content ICP analysis.

| Element | Weight(%) | Atomic ratio |
|---------|-----------|--------------|
| K       | 30.37     | 0.7767       |
| Be      | 3.34      | 0.3711       |

**Table S6.** The elemental content EA analysis.

| Element | Weight(%) |
|---------|-----------|
| N       | ≪0.3      |
| C       | ≪0.3      |
| H       | ≪0.3      |

**Table S7.** Experimental birefringence of  $\text{K}_2(\text{BeS})\text{O}_4\text{F}_2$  at 546.1 nm.

| Crystal                                      | $\Delta R$ (nm) | T ( $\mu\text{m}$ ) | $\Delta n$ |
|----------------------------------------------|-----------------|---------------------|------------|
| $\text{K}_2(\text{BeS})\text{O}_4\text{F}_2$ | 516.9           | 9.22                | 0.056      |

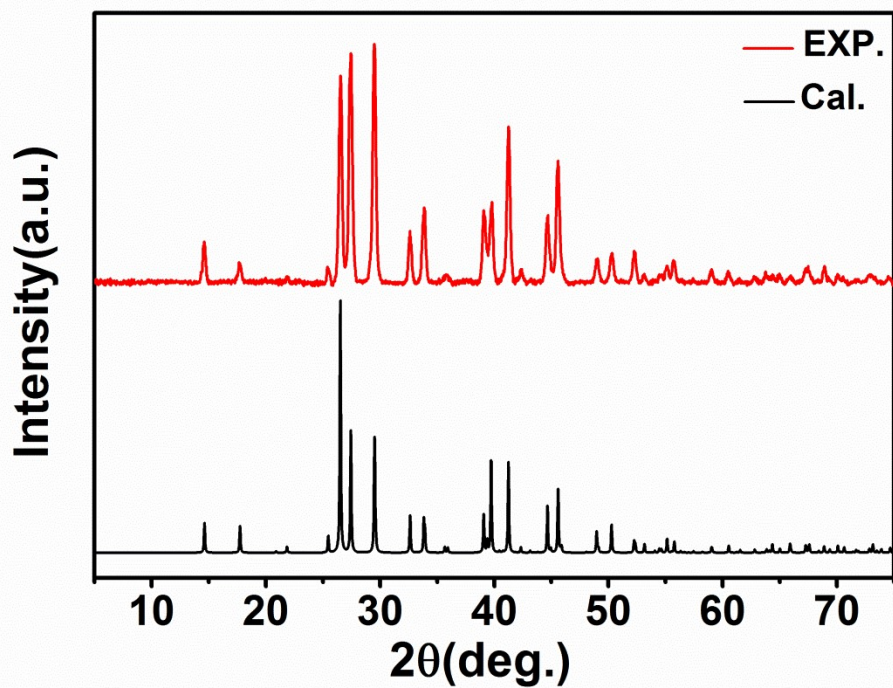

**Figure S1.** Powder XRD patterns of the simulated and experimental for  $K_2(BeS)O_4F_2$

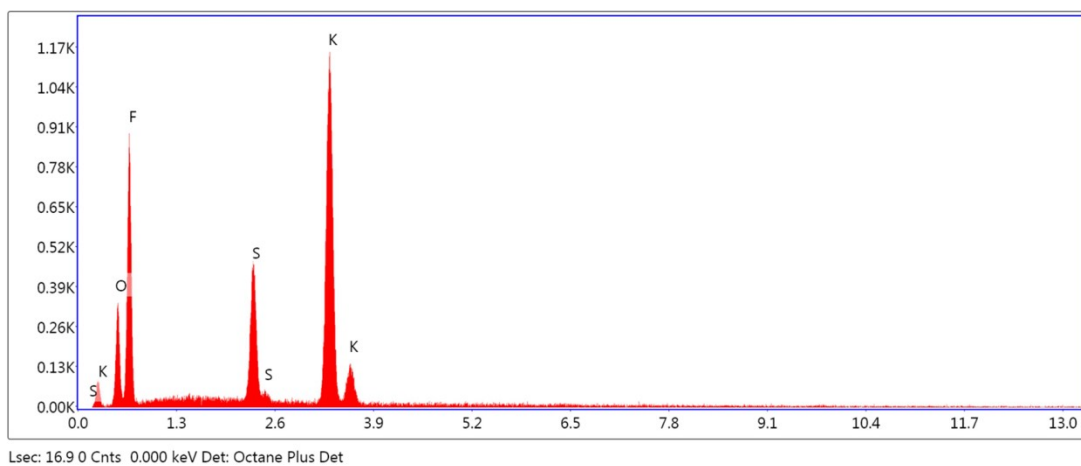

**Figure S2.** EDS analysis of single crystal for  $K_2(BeS)O_4F_2$

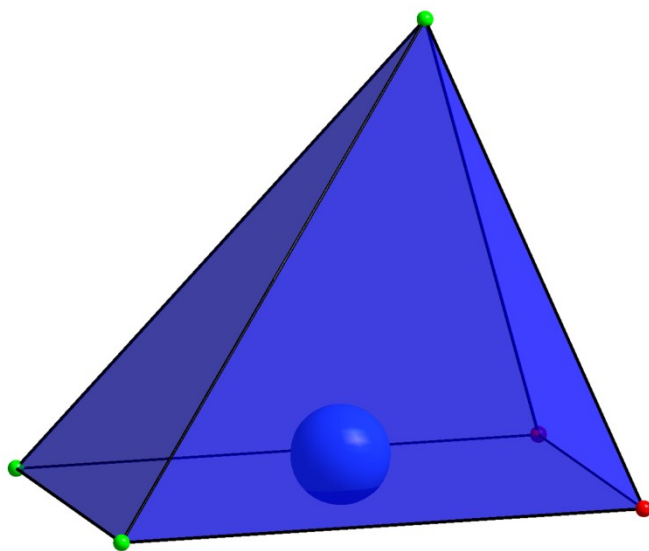

Figure S3. Polyhedron of K, F and O atoms for  $K_2(BeS)O_4F_2$

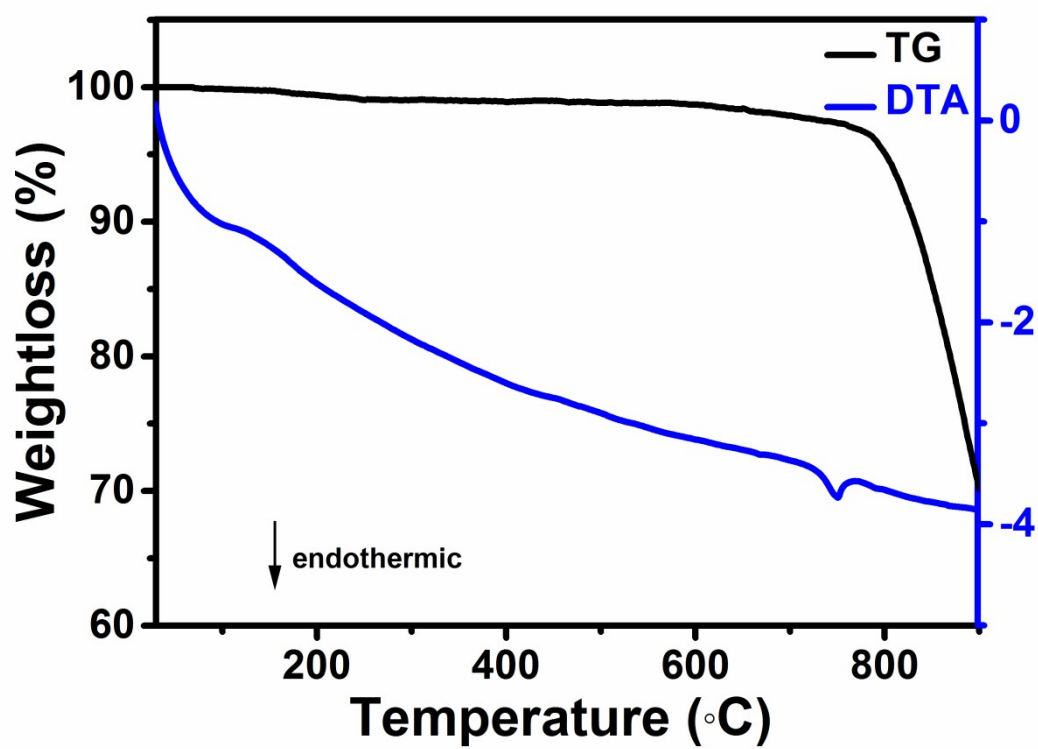

Figure S4. TG and DTA curves of  $K_2(BeS)O_4F_2$ .

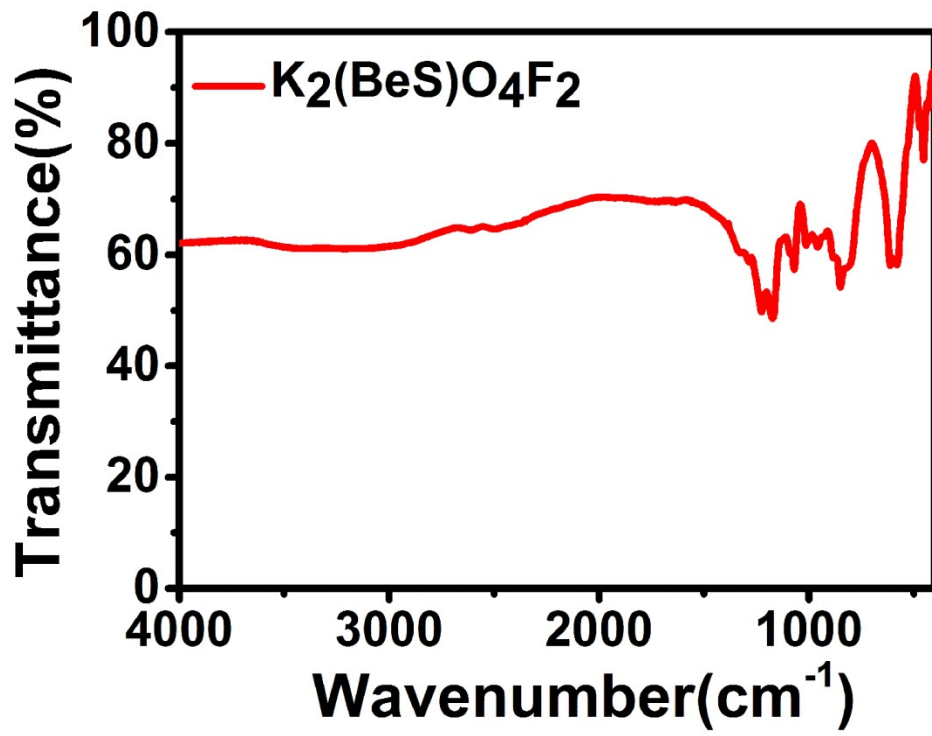

Figure S5. IR transmittance spectra of  $K_2(BeS)O_4F_2$

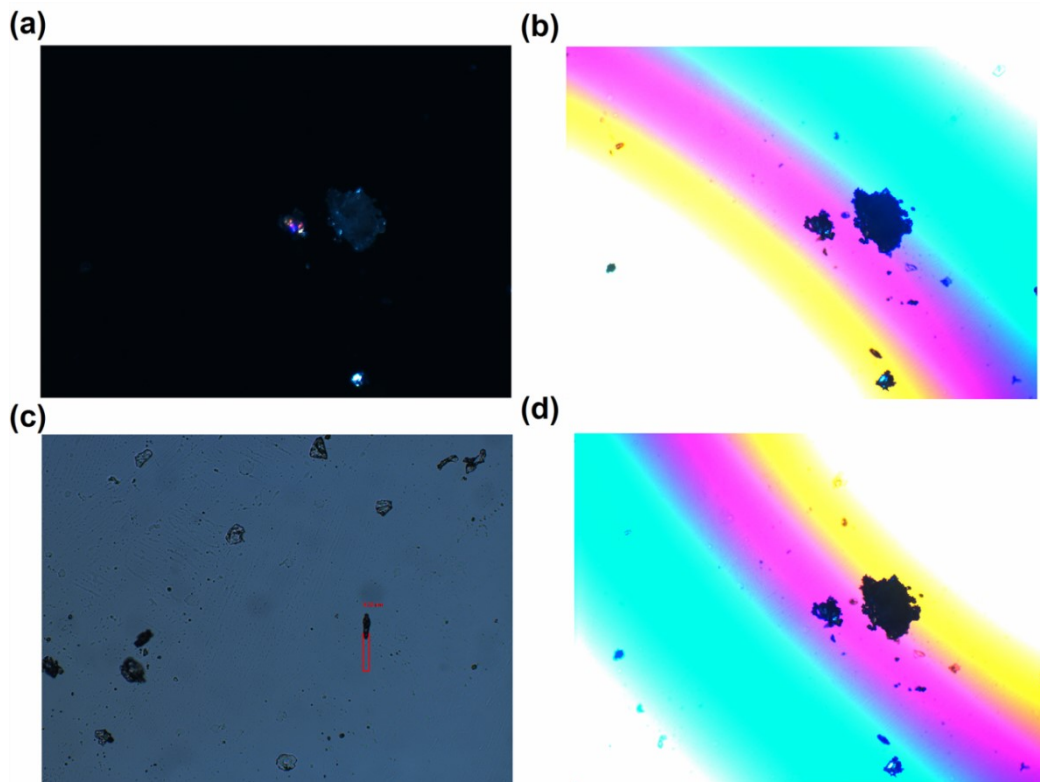

Figure S6. Measurement of birefringence for  $K_2(BeS)O_4F_2$ .



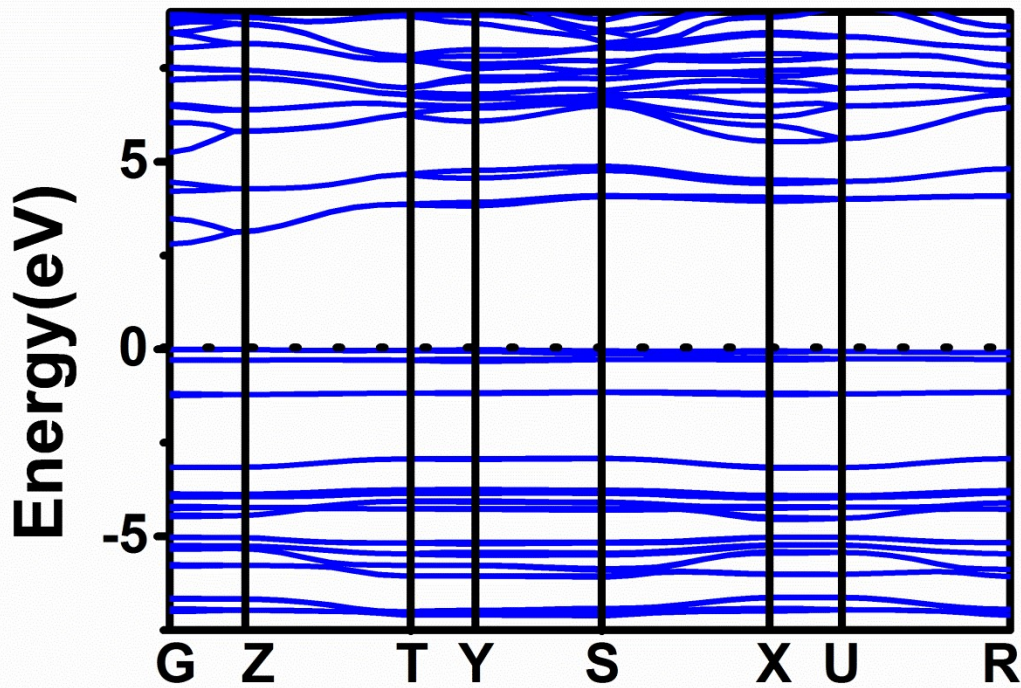

Figure S7. Calculated electronic band structure of  $K_2(BeS)O_4F_2$ .

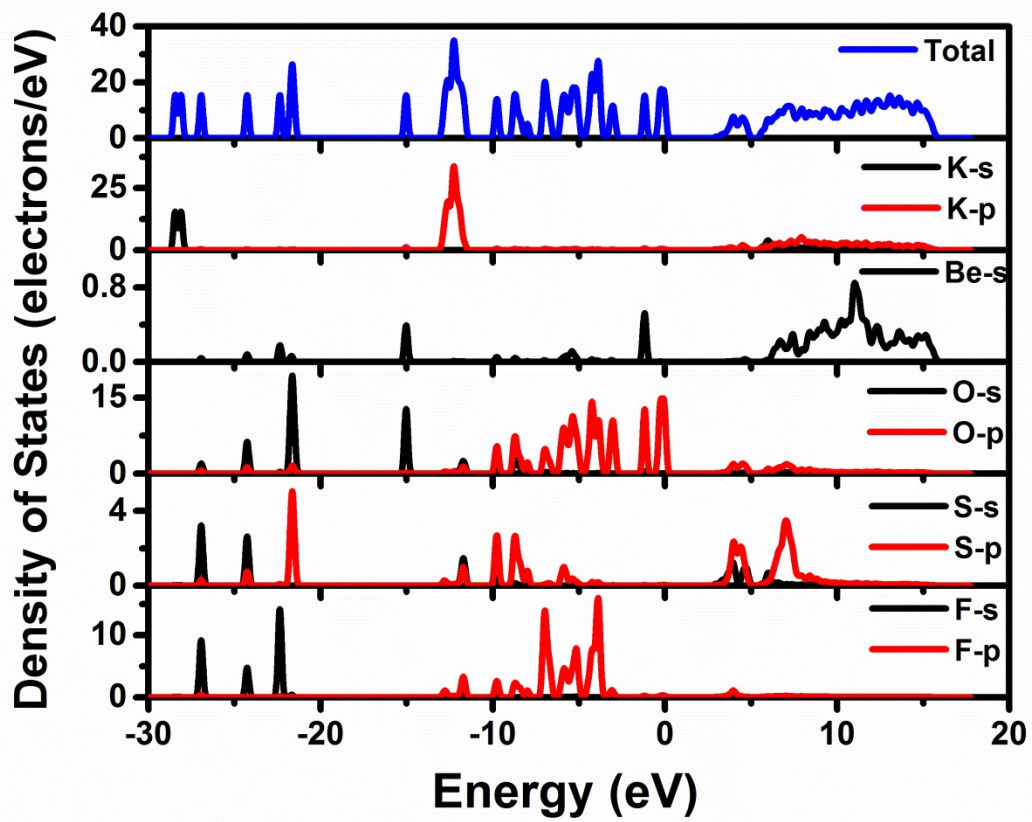

Figure S8. TDOS and PDOS of  $K_2(BeS)O_4F_2$ .

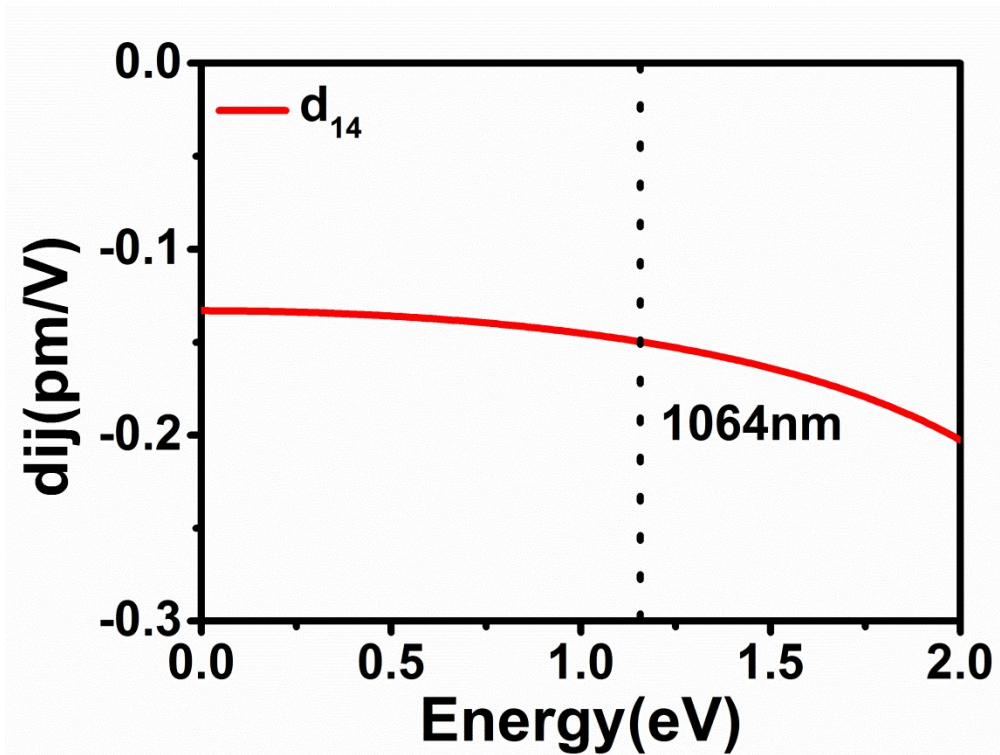

Figure S9. The calculated SHG coefficient of  $K_2(BeS)O_4F_2$ .

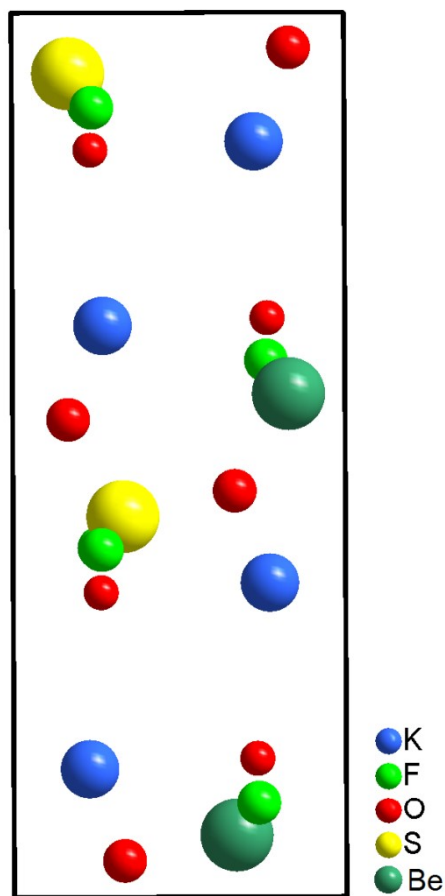

Figure S10. The identified way about Be and S atoms in calculating part.
